# Supplementary material for: A cis-Regulatory Signature for Chordate Anterior Neuroectodermal Genes
Source: PubMed Central journal article supplement (PMC2855326; doi:10.1371/journal.pgen.1000912), 2010-04-15
Supplement: pgen.1000912.s003.pdf [file pgen.1000912.s003.pdf]

**Figure S3 : Motif-tissue scores of the 2xGATTA *cis*-regulatory signature depending on window size.**

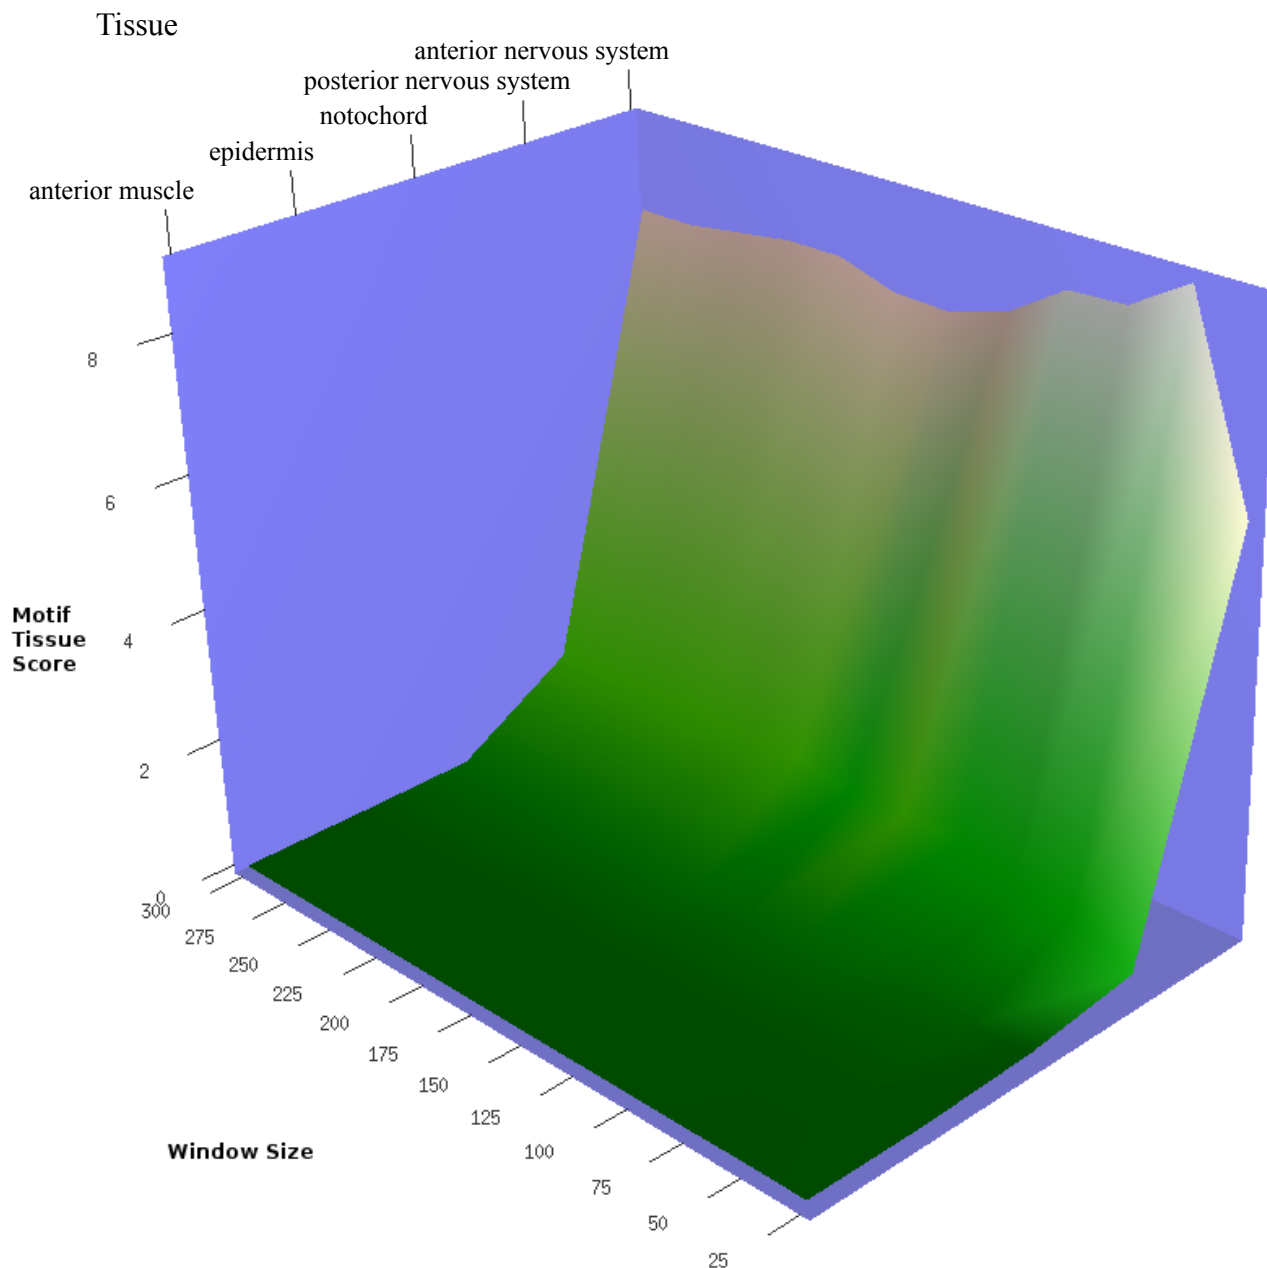

**Figure S3: Motif-tissue scores of the 2xGATTA *cis*-regulatory signature depending on window size.** Window size between two GATTA motifs has been varied from 25 to 300 bps. It can be seen that the window size parameter does not to a large extent influence the results and never changes the order of the tissues; the anterior nervous system is always the highest ranking tissue. Procedures are described in Protocol S1.
