# Supplementary material for: A cis-Regulatory Signature for Chordate Anterior Neuroectodermal Genes
Source: PubMed Central journal article supplement (PMC2855326; doi:10.1371/journal.pgen.1000912), 2010-04-15
Supplement: pgen.1000912.s007.pdf [file pgen.1000912.s007.pdf]

**Table S3: Motif-Tissue-Scores of the ten highest-scoring motif duplicates in the anterior and posterior nervous system.**

| Duplicated Motif within 125bp | Motif-Tissue score in anterior nervous system genes | Motif-Tissue score in posterior nervous system genes |
|-------------------------------|-----------------------------------------------------|------------------------------------------------------|
| 2xAAAAC                       | 9.73                                                | 0.35                                                 |
| 2xAATIG                       | 9.27                                                | 0.69                                                 |
| 2xGATTA                       | 8.27                                                | 0.84                                                 |
| 2xAAACA                       | 7.77                                                | 1.38                                                 |
| 2xATTAG                       | 7.01                                                | 0.31                                                 |
| 2xAAATC                       | 6.81                                                | 0.12                                                 |
| 2xATTAA                       | 6.76                                                | 2.01                                                 |
| 2xAATTA                       | 6.73                                                | 1.71                                                 |
| 2xAAAGC                       | 6.59                                                | 1.15                                                 |
| 2xAACAA                       | 6.44                                                | 2.81                                                 |
