# Supplementary material for: A cis-Regulatory Signature for Chordate Anterior Neuroectodermal Genes
Source: PubMed Central journal article supplement (PMC2855326; doi:10.1371/journal.pgen.1000912), 2010-04-15
Supplement: pgen.1000912.s008.pdf [file pgen.1000912.s008.pdf]

| gene name    | gene model   | position/gene | size(pb) | position/genome (assembly 2005) | expression domains                                   |
|--------------|--------------|---------------|----------|---------------------------------|------------------------------------------------------|
| D1 (pitx)    | ci0100147848 | 5'            | 220      | Scaffold_63:217,283-217,498     | ANB                                                  |
| Eya1         | ci0100137801 | intron        | 1239     | scaffold_65:427,730-428,968     | ANB, anterior head epidermis, palps, mesenchyme      |
| Six3 (I)     | ci0100153410 | 5'            | 161      | chr10p:958,511-958,671          | ANB, anterior head epidermis, palps, mesenchyme      |
| Efnb3        | ci0100148665 | intron        | 698      | chr01p:2242681-2244081          | anterior head epidermis                              |
| Hes1         | ci0100143019 | 5'            | 929      | chr03p:4157771-4159410          | ASV, tail muscles, mesenchyme                        |
| Tbx2/3       | ci0100138873 | intron        | 1036     | chr04q:5694673-5696662          | ASV, anterior head epidermis                         |
| ci0100154565 | ci0100154565 | 5'            | 915      | chr07q:6296611-6298207          | ASV, anterior head epidermis                         |
| FoxF_3'      | ci0100137186 | 3'            | 613      | chr03q:2550777-2552248          | ASV, head epidermis, mesenchyme                      |
| Otx (II)     | ci0100133709 | 5'            | 402      | chr04q:4291433-4291769          | ASV, PSV                                             |
| Ets          | ci0100140048 | 5'            | 743      | chr10p:1,599,065-1,599,760      | ASV, palps, tail tip epid., mesench.(weak)           |
| Zswim        | ci0100153738 | 5'            | 675      | chr08q:2711850-2712450          | ASV, palps, tail tip epid, mesench., notocord (weak) |
| Onecut       | ci0100139609 | intron        | 738      | chr06q:719674-720358            | -                                                    |
| FoxF_5'      | ci0100137186 | 5'            | 681      | chr03q:2565610-2567201          | -                                                    |
| Otx (I)      | ci0100133709 | intron        | 740      | chr04q:4276015-4276514          | -                                                    |
| Six3 (II)    | ci0100153410 | 3'            | 611      | chr10p:953564-954601            | -                                                    |
| Otp          | ci0100132453 | 5'            | 360      | chr14q:2222502-2223394          | -                                                    |
| Gsx (I)      | ci0100151030 | 5'            | 277      | chr02q:5891182-5892355          | -                                                    |
| Gsx (II)     | ci0100151030 | 5'            | 321      | chr02q:5890790-5891043          | -                                                    |
| Isl1         | ci0100134923 | intron        | 865      | scaffold_95:332634-334380       | -                                                    |
| Mid2         | ci0100137572 | intron        | 384      | chr02q:4278147-4279423          | -                                                    |
| Meis         | ci0100130253 | intron        | 502      | chr10q:2080805-2082233          | -                                                    |
| Lphn3        | ci0100150579 | intron        | 454      | chr05q:6140041-6141425          | -                                                    |
| MytL         | ci0100131573 | 5'            | 699      | chr01q:1546517-1547123          | -                                                    |
| Pax6         | ci0100144072 | 5'            | 221      | chr09q:3329200-3329372          | -                                                    |

**Table S4: Enhancer screen**

List of regions cloned for the enhancer screen. Gene name indicates the most closely located gene to the tested element, and the corresponding gene model is indicated in the next column. The type of location of the element relatively to the gene is indicated in the third column. The size of the tested element is reported in the fourth column. The position of the element in the *Ciona intestinalis* genome (2005 JGI assembly) is reported in the fifth column and expression domain of each enhancer in the last column. Note that all enhancers without expression or with weak expression in the mesenchyme were indicated as “negative”.
